# Supplementary material for: Vulnerability to shear stress caused by altered peri-endothelial matrix is a key feature of Moyamoya disease
Source: PubMed Central journal article supplement (PMC7810726; doi:10.1038/s41598-021-81282-9), 2021-01-15
Supplement: 41598_2021_81282_MOESM1_ESM.pdf [file 41598_2021_81282_MOESM1_ESM.pdf]

**Vulnerability to shear stress caused by altered peri-endothelial matrix is a key feature  
of Moyamoya disease**

Muneaki Matsuo<sup>1\*</sup>, Satomi Nadanaka<sup>2</sup>, Minami Soga<sup>3</sup>, Taku Sugiyama<sup>4</sup>, Shota Serigano<sup>5</sup>, Kenjiro Shimano<sup>5</sup>, Fumio Ichinose<sup>1</sup>, Takuji Nakamura<sup>1</sup>, Toshiyuki Maeda<sup>1</sup>, Kiyohiro Houkin<sup>4</sup>, Takumi Era<sup>3</sup>, Hiroshi Kitagawa<sup>2</sup>

1. Department of Pediatrics, Saga University, Faculty of Medicine, Saga, Japan
2. Laboratory of Biochemistry, Kobe Pharmaceutical University, Kobe, Japan
3. Department of Cell Modulation, Institute of Molecular Embryology and Genetics, Kumamoto University, Kumamoto, Japan
4. Department of Neurosurgery, Hokkaido University Graduate School of Medicine, Sapporo, Japan
5. Department of Mechanical Systems Engineering, Faculty of Engineering, Tokyo City University, Japan

\*Correspondence to:

Muneaki Matsuo, MD.

5-1-1 Nabeshima, Saga, 849-8501, Japan

[matsuo@cc.saga-u.ac.jp](mailto:matsuo@cc.saga-u.ac.jp) ORCID; 0000-0002-8667-836X

## Supplementary Table 1

### Primers used for RT-PCR

| Gene Name      | 5'-primer                      | 3'-primer                        |
|----------------|--------------------------------|----------------------------------|
| VE-Cadherin    | 5'-TGGATGAGAATGACAATGCC-3'     | 5'-TTGAACTTCACGTTTCGTGG-3'       |
| CD31           | 5'-AGGTGTTGGTGGAAGGAGTG-3'     | 5'-CGTGTAGTTGCCACTGTGCT-3'       |
| vWF            | 5'-AACACCTTTGATGGGAGCAT-3'     | 5'-TCACTCTCTTGCCATTCTGGA-3'      |
| $\alpha$ -SMA  | 5'-AGAACATGGCATCATCACCA-3'     | 5'-TACATGGCTGGGACATGGAA-3'       |
| HAS-2          | 5'-GTCTCAAATTCATCTGATCTC-3'    | 5'-ACATTCCTTAAGTAGTCTGG-3'       |
| CD105          | 5'- CCACTAGCCAGGTCTCGAAG -3'   | 5'- GATGCAGGAAGACACTGCTG -3'     |
| Oct-4          | 5'-GACAGGGGGAGGGGAGGAGCTAGG-3' | 5'-CTTCCCTCCAACCAGTTGCCCCAAAC-3' |
| $\beta$ -actin | 5'- TCCTGTGGCATCCACGAAACT -3'  | 5'- GAAGCATTGCGGTGGACGAT -3'     |

## Supplementary Table 2

### Primers used for real-time PCR

| Gene Name     | 5'-primer                           | 3'-primer                     |
|---------------|-------------------------------------|-------------------------------|
| hXylT1        | 5'-AAGAAGCCACCGAGTAGAC-3'           | 5'-TGGACACATCCTTCCCGT-3'      |
| hXylT2        | 5'-CGCTACAAGCTGGCGAT-3'             | 5'-ACTGTCTGTGTCCTTGGAAC-3'    |
| hGlcAT-I      | 5'-CCTGCCTACTATCTATGTTGTTAC-3'      | 5'-ACCACCAGGTGTGTGAA-3'       |
| hChSy1        | 5'-GGTTTGGCATCACGTGTAT-3'           | 5'-ACTCCTACTTCCTGGCTC-3'      |
| hChPF         | 5'-GACCCTCATTTCCGAAGTG-3'           | 5'-GCCAGATGGCTGGTATT-3'       |
| hChGn-1       | 5'-AGAAGAAATAAATGAAGTCAAAGGAATAC-3' | 5'-GAAGTAGTAGTCCACATCACAG-3'  |
| hUST          | 5'-ACCATGGACCACCTCCTAGTAA-3'        | 5'-CACACTTGCCTACCCTGTTGTA-3'  |
| hC4ST-1       | 5'-AAACGCCAGCGGAAGAA-3'             | 5'-GGGATGGCAGAGTGAGTAGA-3'    |
| hC4ST-2       | 5'-GAGGGAAAGTTCTTTGTTTAAGTG-3'      | 5'-CGGCCTTAACAGCCATAAT-3'     |
| hC6ST-1       | 5'-CAGGGGAGGAAGAGGAAGAG-3'          | 5'-CCCTGCTGGTTGAAGAACTC -3'   |
| hD4ST         | 5'-ACTCAGAGGACAGGGCTA-3'            | 5'-ACCAAGTGGACTGCATAATC-3'    |
| hGalNAc4S-6ST | 5'-TCGTGTGGACAGTAAGCAGAT-3'         | 5'-TGTAAGAAGCCATTACCAAGGTC-3' |
| hGAPDH        | 5'-ATGGGTGTGAACCATGAGAAGTA-3'       | 5'-GGCAGTGATGGCATGGAC -3'     |

Figure S1. DNA analyses for RNF213 RNF213 SNP : G>A ss179362673

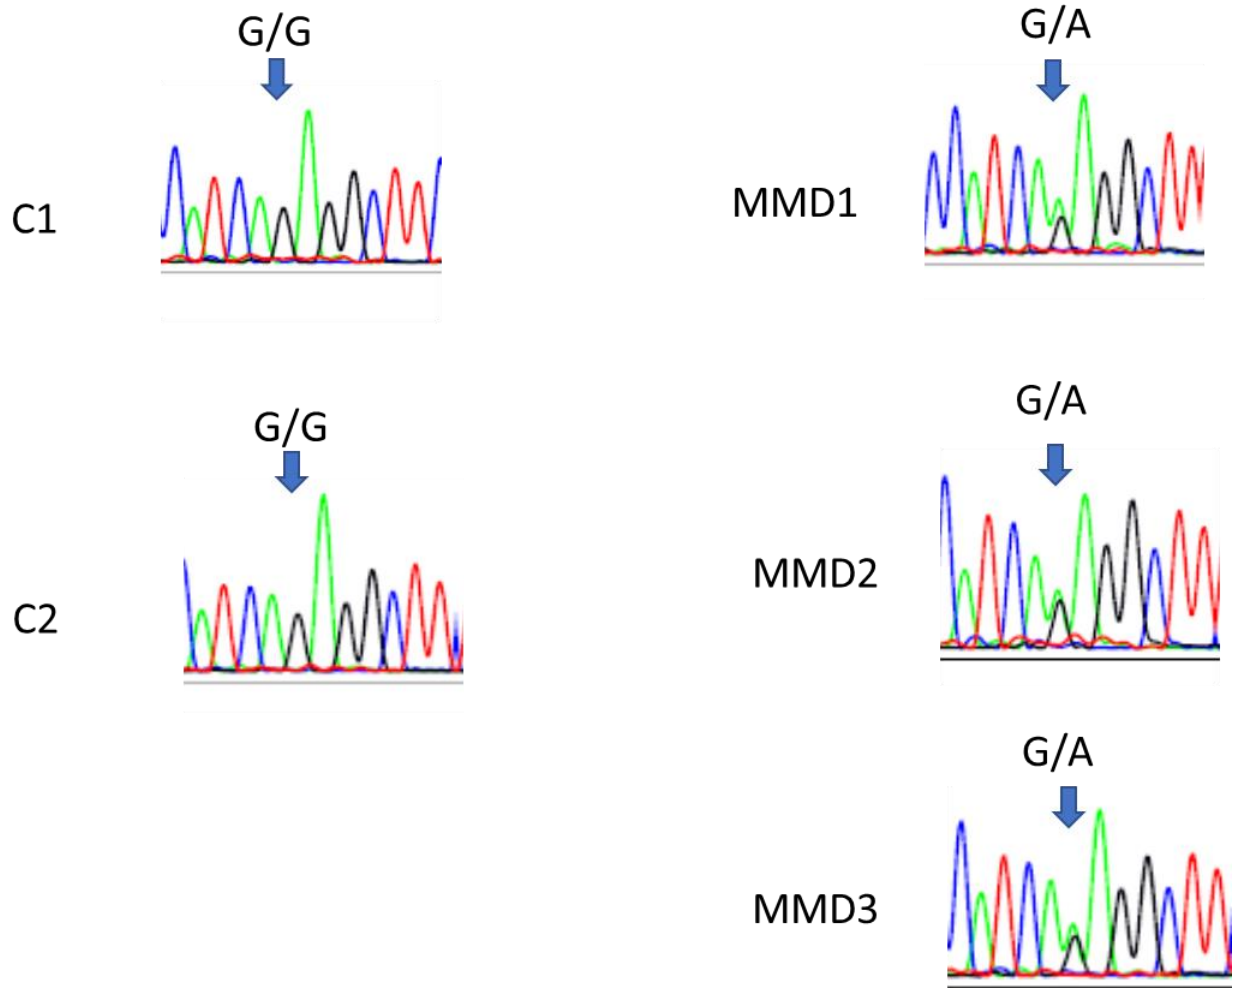

Figure S2. Three-dimensional models of arterial branches.

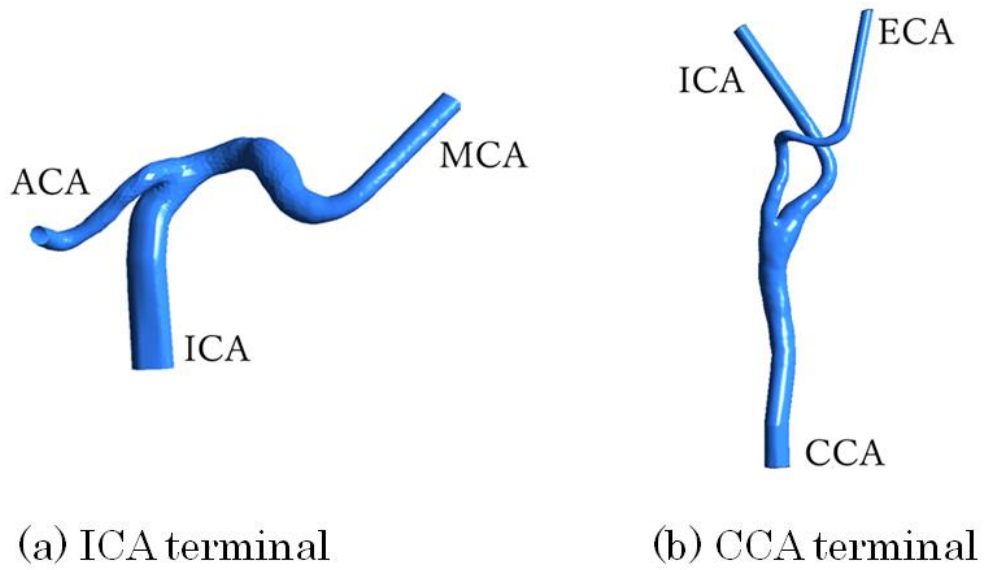

Figure S3. Biosynthesis of chondroitin sulfate.

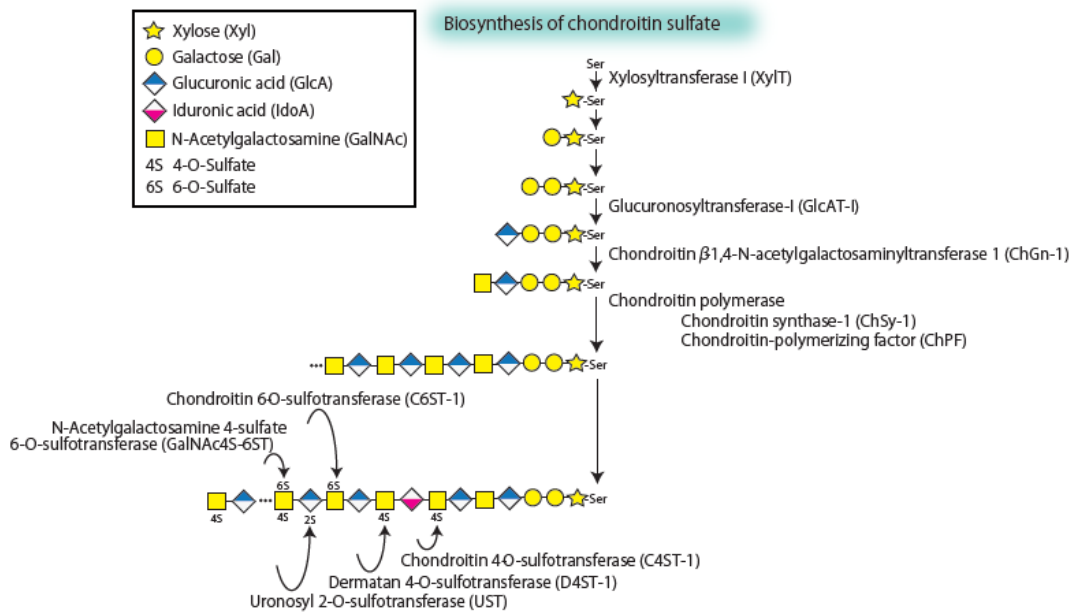

Figure S4. RT-PCR results of endothelial-differentiated iPSCs

A. Cadherin

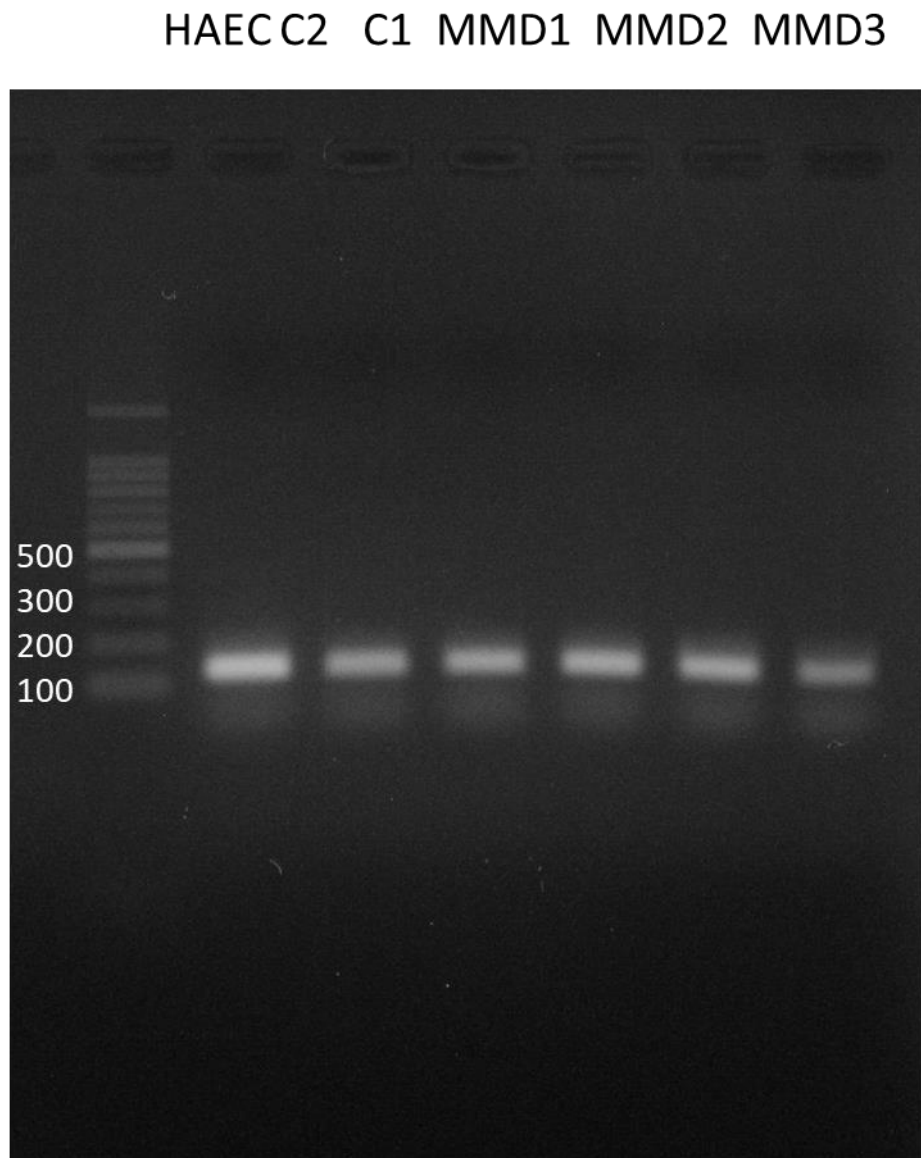

B. CD31

HAEC C2 C1 MMD1 MMD2 MMD3

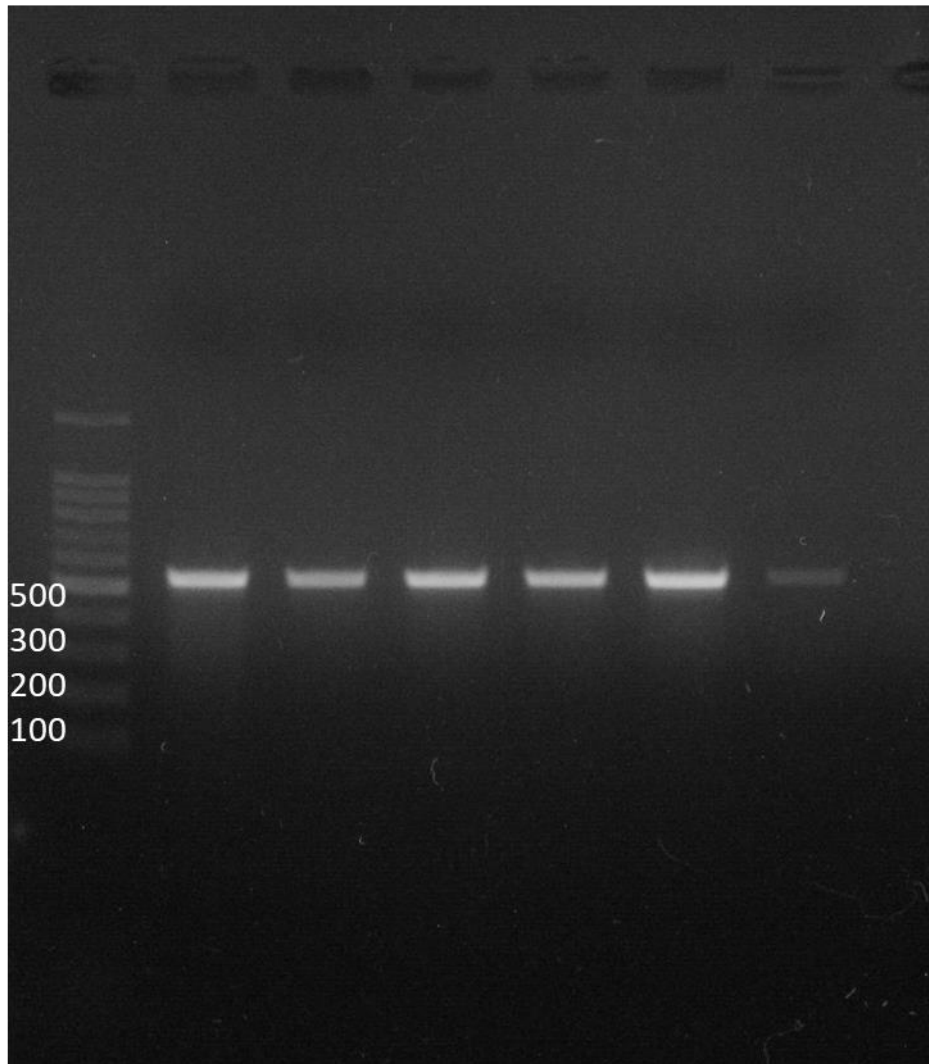

C. vWF

HAEC C2 C1 MMD1 MMD2 MMD3

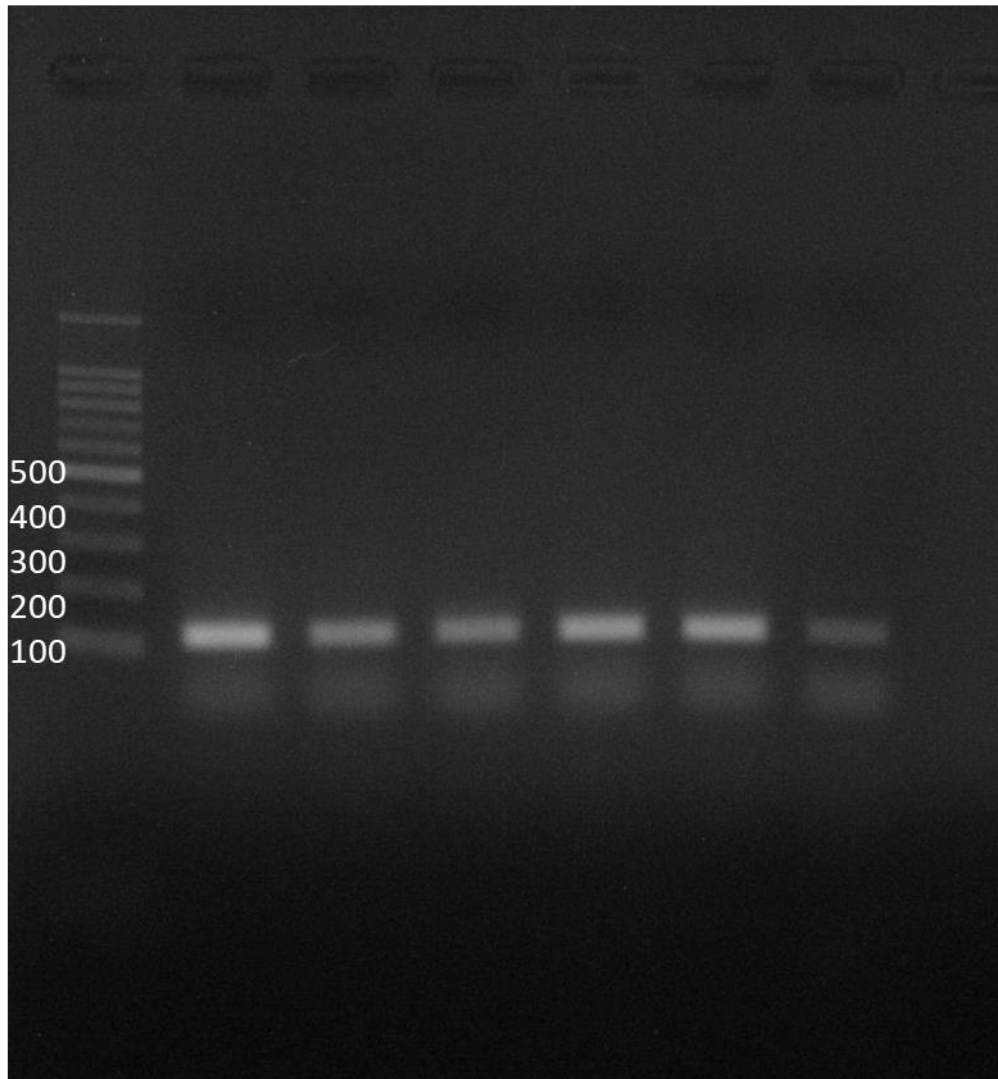



D.  $\alpha$ -SMA

HAEC C2 C1 MMD1 MMD2 MMD3

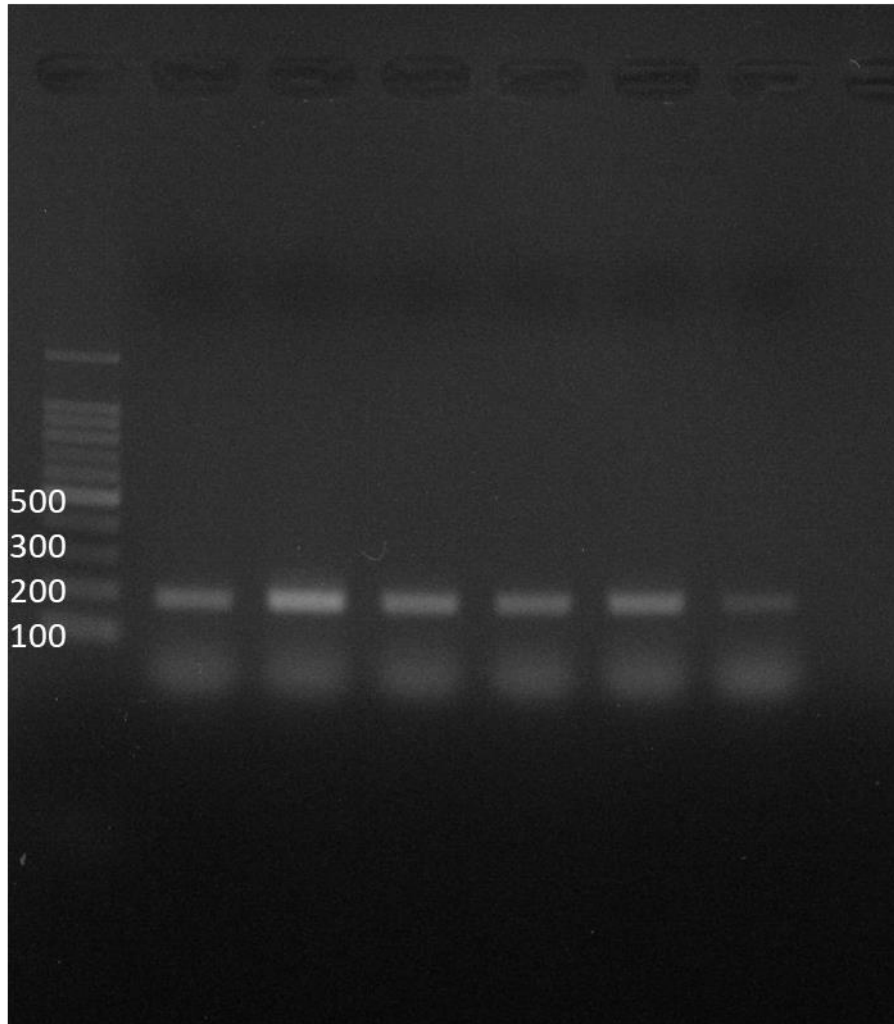

E. HAS2

HAEC C2 C1 MMD1 MMD2 MMD3

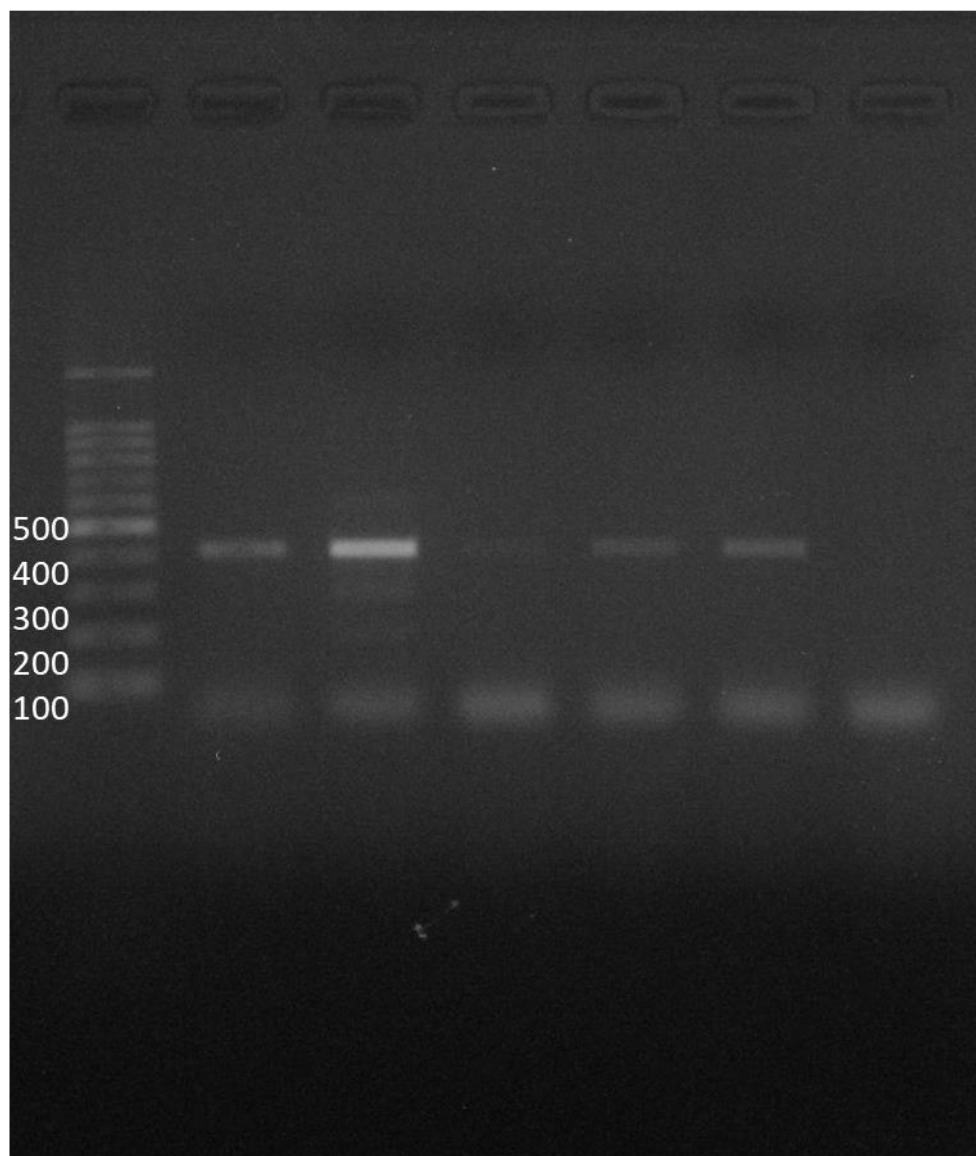

F. CD105

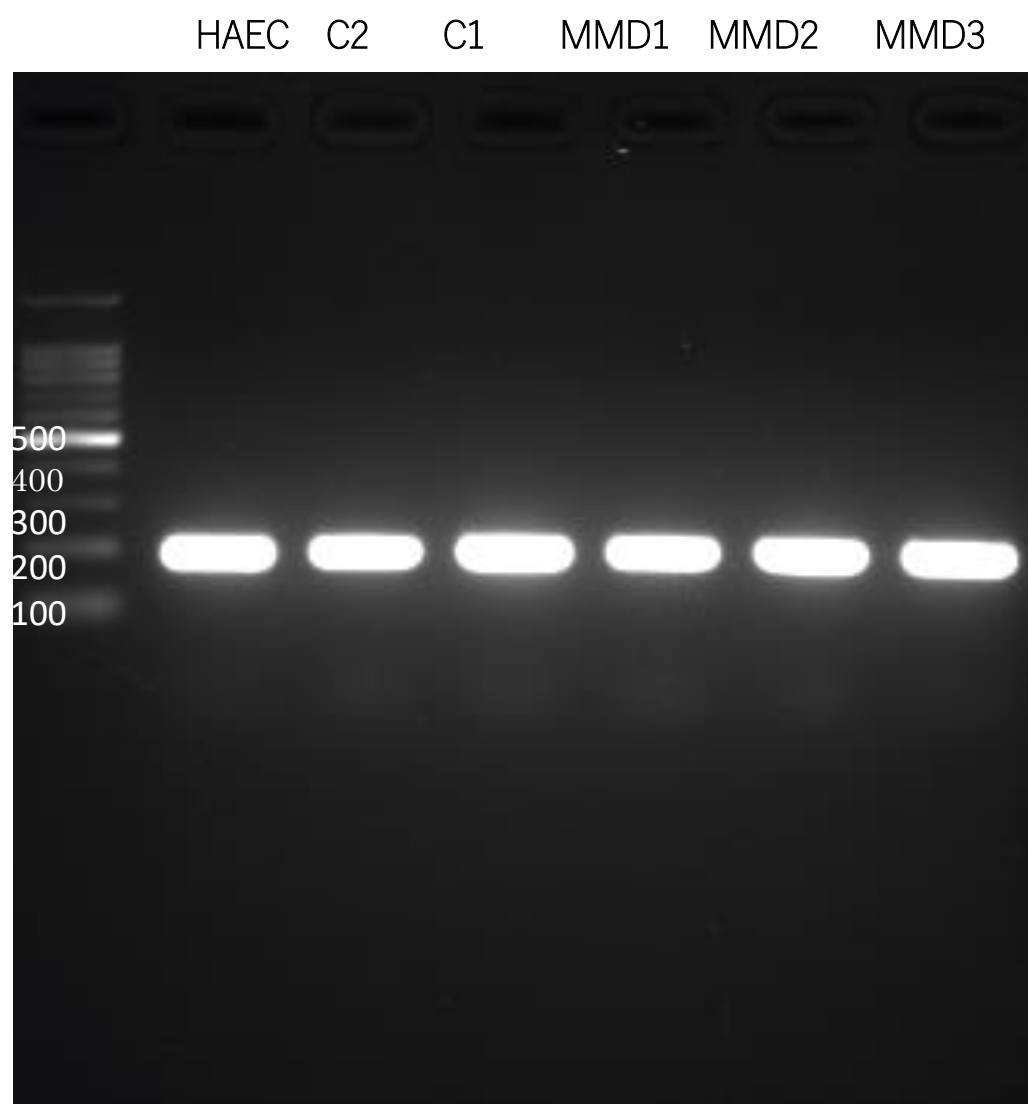

G.  $\beta$ -actin

HAEC C2 C1 MMD1 MMD2 MMD3

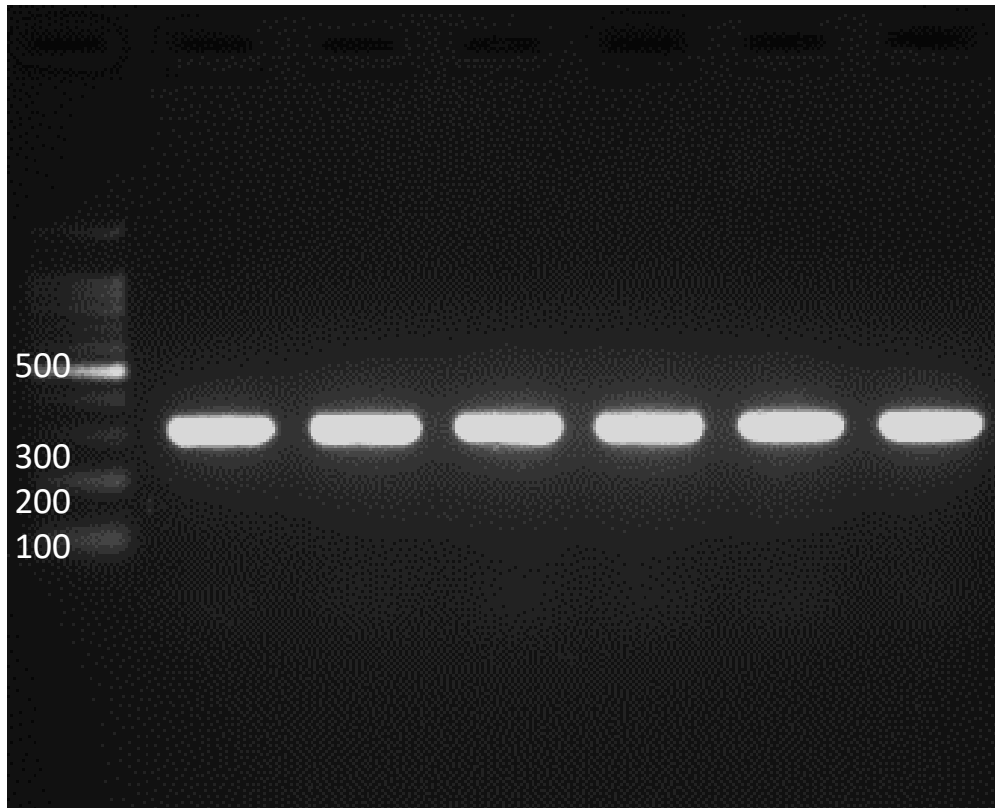

Figure S5. Network analysis by GeneMANIA

### Networks

- Physical Interactions
- Co-expression
- Predicted
- Co-localization
- Pathway
- Genetic Interactions
- Shared protein domains

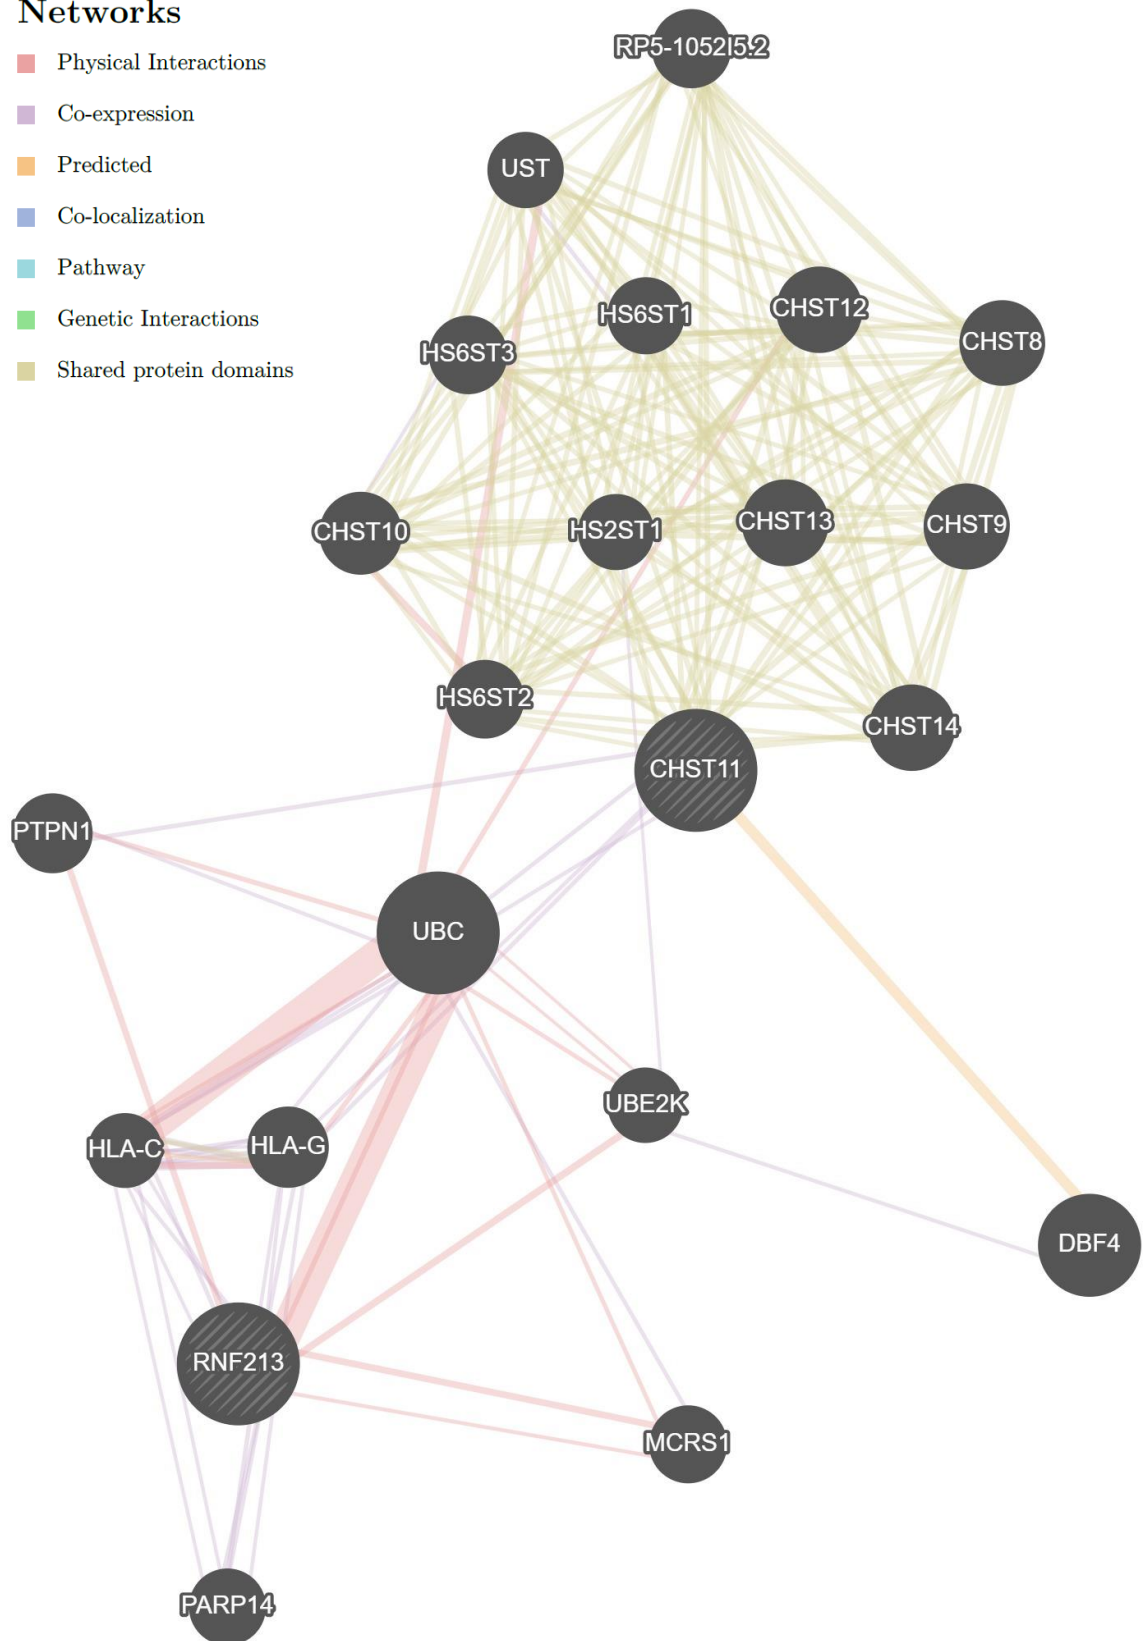

| <b>Gene</b>  | <b>Description</b>                                                                   | <b>Rank</b> |
|--------------|--------------------------------------------------------------------------------------|-------------|
| RNF213       | ring finger protein 213 [Source:HGNC Symbol;Acc:HGNC:14539]                          | N/A         |
| CHST11       | carbohydrate sulfotransferase 11 [Source:HGNC Symbol;Acc:HGNC:17422]                 | N/A         |
| UBC          | ubiquitin C [Source:HGNC Symbol;Acc:HGNC:12468]                                      | 1           |
| DBF4         | DBF4 zinc finger [Source:HGNC Symbol;Acc:HGNC:17364]                                 | 2           |
| CHST13       | carbohydrate sulfotransferase 13 [Source:HGNC Symbol;Acc:HGNC:21755]                 | 3           |
| CHST12       | carbohydrate sulfotransferase 12 [Source:HGNC Symbol;Acc:HGNC:17423]                 | 4           |
| CHST14       | carbohydrate sulfotransferase 14 [Source:HGNC Symbol;Acc:HGNC:24464]                 | 5           |
| CHST9        | carbohydrate sulfotransferase 9 [Source:HGNC Symbol;Acc:HGNC:19898]                  | 6           |
| CHST8        | carbohydrate sulfotransferase 8 [Source:HGNC Symbol;Acc:HGNC:15993]                  | 7           |
| CHST10       | carbohydrate sulfotransferase 10 [Source:HGNC Symbol;Acc:HGNC:19650]                 | 8           |
| HLA-G        | major histocompatibility complex, class I, G [Source:HGNC Symbol;Acc:HGNC:4964]      | 9           |
| PTPN1        | protein tyrosine phosphatase, non-receptor type 1 [Source:HGNC Symbol;Acc:HGNC:9642] | 10          |
| RP5-1052I5.2 |                                                                                      | 11          |
| HS6ST2       | heparan sulfate 6-O-sulfotransferase 2 [Source:HGNC Symbol;Acc:HGNC:19133]           | 12          |
| HS6ST3       | heparan sulfate 6-O-sulfotransferase 3 [Source:HGNC Symbol;Acc:HGNC:19134]           | 13          |
| MCRS1        | microspherule protein 1 [Source:HGNC Symbol;Acc:HGNC:6960]                           | 14          |
| HS6ST1       | heparan sulfate 6-O-sulfotransferase 1 [Source:HGNC Symbol;Acc:HGNC:5201]            | 15          |
| PARP14       | poly(ADP-ribose) polymerase family member 14 [Source:HGNC Symbol;Acc:HGNC:29232]     | 16          |
| UST          | uronyl 2-sulfotransferase [Source:HGNC Symbol;Acc:HGNC:17223]                        | 17          |
| HS2ST1       | heparan sulfate 2-O-sulfotransferase 1 [Source:HGNC Symbol;Acc:HGNC:5193]            | 18          |
| UBE2K        | ubiquitin conjugating enzyme E2 K [Source:HGNC Symbol;Acc:HGNC:4914]                 | 19          |
| HLA-C        | major histocompatibility complex, class I, C [Source:HGNC Symbol;Acc:HGNC:4933]      | 20          |
